# Supplementary material
Source: PubMed Central journal article supplement (PMC2901444)
Supplement: 1004661107_pnas.201004661SI.pdf [file 1004661107_pnas.201004661SI.pdf]

# Supporting Information

Pham et al. 10.1073/pnas.1004661107

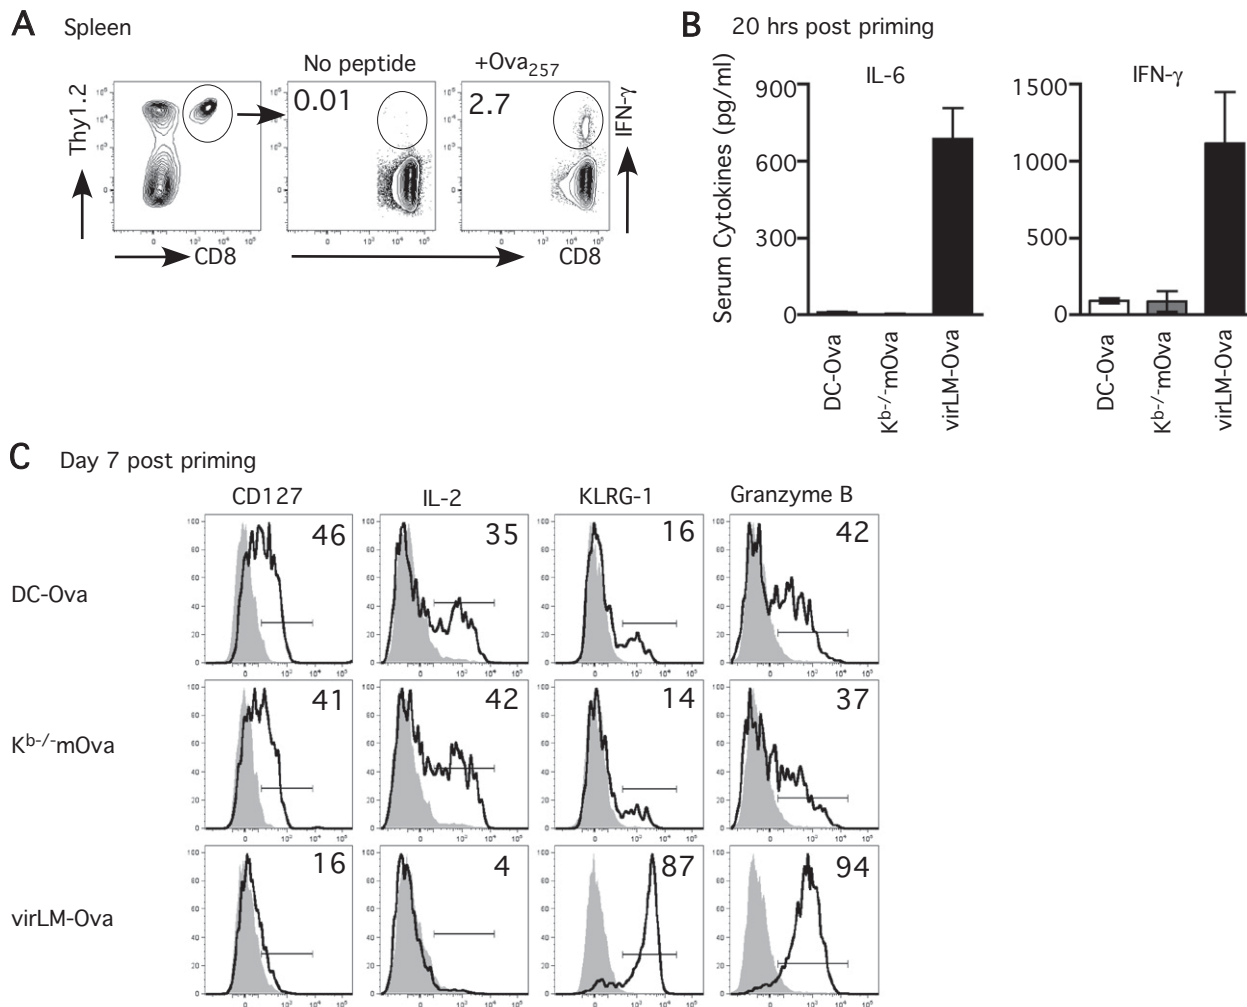

**Fig. S1.** Cross-priming with cell-associated antigen generates functional antigen-specific CD8 T cells with accelerated memory phenotype in vivo. Naïve C57BL/6 (B6) mice received Ova<sub>257</sub>-coated dendritic cells (DC) ( $\sim 10^6$  DC/mouse),  $\sim 10^7$  irradiated K<sup>b</sup>-/-mOva splenocytes, or virulent *Listeria monocytogenes* expressing ovalbumin (virLM-Ova) ( $\sim 10^5$  cfu/mouse). (A) Representative dot plots showing detection of Ova<sub>257</sub>-specific CD8 T cells by ex vivo peptide stimulation from spleen at day 7 after priming from mice receiving irradiated K<sup>b</sup>-/-mOva splenocytes. (B) Serum IL-6 and IFN-γ 20 h after immunization. (C) Representative histograms showing phenotypic and functional status of Ova<sub>257</sub>-specific CD8 T cells at day 7 after the three different priming methods indicated. Numbers in histograms represent percentage of cells that are positive for the indicated markers. Shaded histograms represent isotype-control staining. Data are representative of two independent experiments.

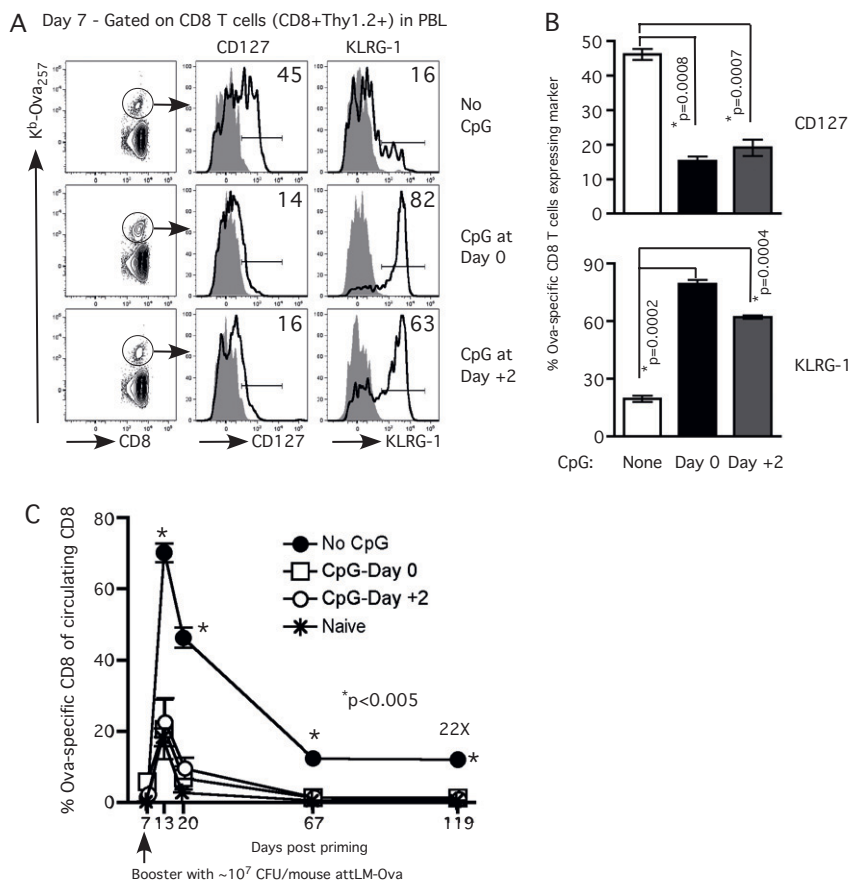

**A**

Non-coated WT C57BL/6 splenocytes

Ova-coated WT C57BL/6 splenocytes

$K^b$ -/-mOva splenocytes

→ Ova

**B**

% Ova-specific CD8 T cells expressing marker

CD127

KLRG-1

Priming:  $K^b$ -/-mOva WT-Ova

Doses:  $10^6$   $10^6$

| Priming       | Dose   | CD127 (%) | KLRG-1 (%) |
|---------------|--------|-----------|------------|
| $K^b$ -/-mOva | $10^6$ | ~80       | ~8         |
| WT-Ova        | $10^6$ | ~85       | ~6         |

**C**

% Ova-specific CD8 of circulating CD8

virLM-Ova Boost

Booster with  $\sim 10^5$  CFU/mouse virLM-Ova

$\square \sim 10^6 K^b$ -/-mOva

$\circ \sim 10^6$  WT-Ova

$\bullet \sim 10^6$  WT

Days post priming

| Days post priming | $\sim 10^6 K^b$ -/-mOva (%) | $\sim 10^6$ WT-Ova (%) | $\sim 10^6$ WT (%) |
|-------------------|-----------------------------|------------------------|--------------------|
| 0                 | ~0                          | ~0                     | ~0                 |
| 10                | ~38                         | ~32                    | ~2                 |
| 50                | ~10                         | ~8                     | ~1                 |

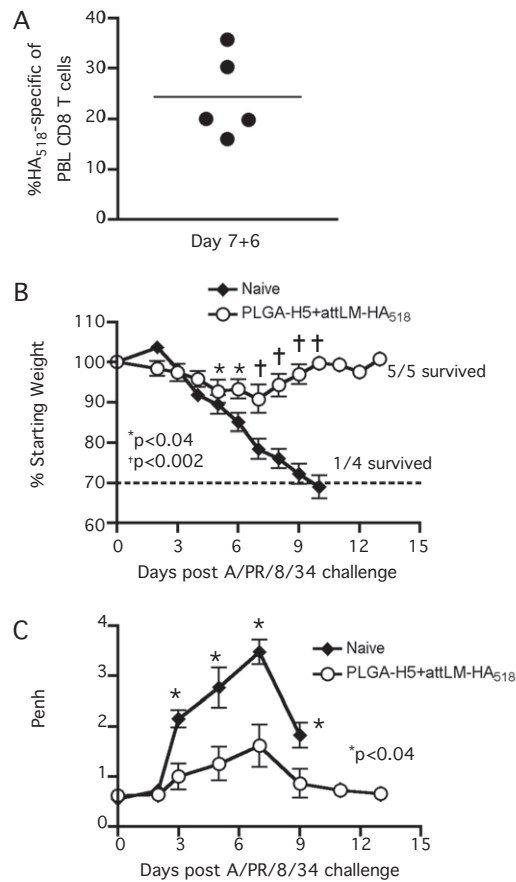

**Fig. S6.** Rapid generation of effector CD8 T cells and protective heterosubtypic immunity via cross-priming with H5-PLGA microspheres followed by booster immunization at day 7. Naïve BALB/c mice were immunized with  $\sim 10^9$  PLGA microspheres coated with recombinant HA H5 protein. Mice received booster immunization with *actA*-, *IntB*-deficient *Listeria monocytogenes* expressing the H-2K<sup>d</sup>-restricted influenza epitope, IYSTVASSL (attLM-HA<sub>518</sub>) ( $\sim 10^7$  cfu/mouse) on day 7 after priming. (A) Frequency of HA<sub>518</sub>-specific CD8 T cells among circulating PBL CD8 T cells at day 6 after boosting (day 7 + 6). On day 7 after boosting (day 7 + 7), naïve BALB/c mice ( $n = 4$ ) and cross-prime-boosted mice ( $n = 5$ ) were challenged with a lethal dose ( $\sim 5$  LD<sub>50</sub>) of influenza A/PR/8/34 (H1N1). (B) Morbidity is measured by weight loss and expressed as percent of starting weight. Numbers on the graph indicate the number of surviving mice/total number of mice. (C) Airway resistance was measured using a whole-body plethysmograph (Buxco Electronics) and expressed as maximal enhanced pause (Penh) values. Baseline Penh values for each mouse were recorded before and at the indicated time points after challenge with influenza A/PR/8/34. Statistical analysis was performed using an unpaired, two-tailed *t* test.
